# Supplementary material for: A three-dimensional Mn-based MOF as a high-performance supercapacitor electrode
Source: Royal Society of Chemistry journal article supplement (doi:10.1039/d2dt02857c), 2023-01-01
Supplement: d2dt02857c1.pdf [file d2dt02857c1.pdf]

## Supporting Information

### A Three-Dimensional Mn-Based MOF as a High-Performance Supercapacitor Electrode

Hongren Rong<sup>a</sup>, Peng Song<sup>a</sup>, Gexiang Gao<sup>a</sup>, Qingyan Jiang<sup>a</sup>, Xiaojuan Chen<sup>a</sup>, Lixin Su<sup>a</sup>, Wen-Long Liu<sup>b\*</sup>, Qi Liu<sup>a\*</sup>

<sup>a</sup>Jiangsu Key Laboratory of Advanced Catalytic Materials and Technology, Advanced Catalysis and Green Manufacturing Collaborative Innovation Center and School of Petrochemical Engineering, Changzhou University, Changzhou, Jiangsu 213164, P. R. China.

<sup>b</sup>School of Chemistry and Chemical Engineering, Yangzhou University, Yangzhou Jiangsu 225009, P. R. China

#### 1. Scheme, Figures and Tables

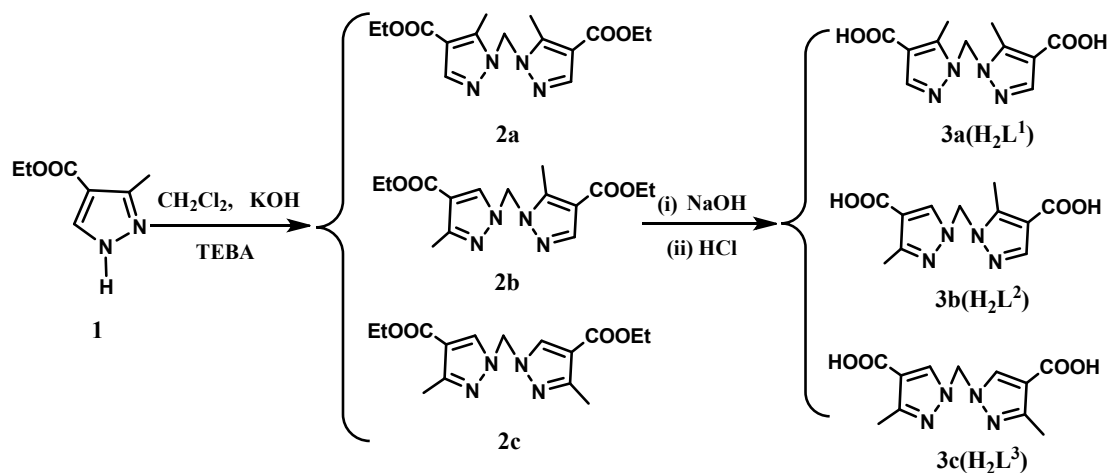

Scheme S1 Synthetic route of the ligands  $H_2L^1$ ,  $H_2L^2$  and  $H_2L^3$

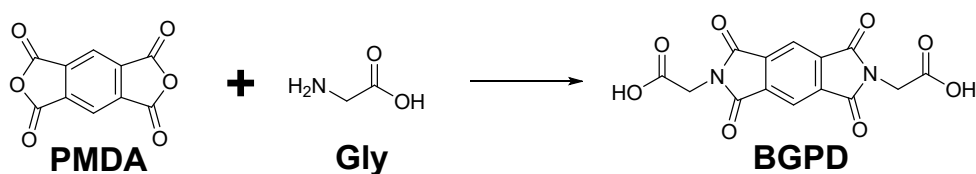

Scheme S2. Synthetic route of BGPD

Table S1 The main bond length (Å) and bond angle (°) of Mn-BGPD

| Mn-BGPD           |            |                   |            |
|-------------------|------------|-------------------|------------|
| Mn(1)-O(2)        | 2.1737(19) | Mn(1)-O(1)C       | 2.1991(19) |
| Mn(1)-O(2)A       | 2.1738(19) | Mn(1)-O(5)A       | 2.1825(19) |
| Mn(1)-O(5)        | 2.1826(19) | Mn(1)-O(1)B       | 2.1991(19) |
| O(2)-Mn(1)-O(2)A  | 180.0      | O(2)-Mn(1)-O(1)C  | 92.05(7)   |
| O(2)-Mn(1)-O(1)B  | 87.95(7)   | O(2)A-Mn(1)-O(1)C | 87.95(7)   |
| O(2)A-Mn(1)-O(1)B | 92.05(7)   | O(5)A-Mn(1)-O(1)B | 88.57(8)   |
| O(2)-Mn(1)-O(5)A  | 89.54(7)   | O(5)A-Mn(1)-O(1)C | 91.43(8)   |
| O(2)A-Mn(1)-O(5)A | 90.46(7)   | O(5)-Mn(1)-O(1)C  | 88.57(8)   |
| O(2)-Mn(1)-O(5)   | 90.46(7)   | O(1)B-Mn(1)-O(1)C | 180.0      |
| O(2)A-Mn(1)-O(5)  | 89.54(7)   | O(5)A-Mn(1)-O(5)  | 180.0      |
| O(5)-Mn(1)-O(1)B  | 91.43(8)   |                   |            |

Symmetry codes: A -x+1,-y+1,-z+1; B -x+1,y-1/2,-z+3/2; C x,-y+3/2,z-1/2

Table S2 The bond length (Å) and bond angle (°) of the hydrogen bond of Mn-BGPD

| D-H...A             | D-H  | H...A | D...A  | ∠D-H...A |
|---------------------|------|-------|--------|----------|
| O(5)-H(5A)...O(1)#1 | 0.96 | 1.90  | 2.7150 | 141.00   |
| O(5)-H(5B)...O(3)#8 | 0.96 | 2.02  | 2.8230 | 140.00   |
| C(2)-H(2A)...O(5)#6 | 0.97 | 2.62  | 3.553  | 161.00   |
| C(2)-H(2B)...O(2)#7 | 0.97 | 2.44  | 3.1349 | 128.00   |

Symmetry codes:#1 -x+1,-y+1,-z+1; #2 -x+1,y-1/2,-z+3/2; #3 x,-y+3/2,z-1/2; #4 -x,-y+1,-z+1; #5 -x+1,y+1/2,-z+3/2; #6 x,y,z+1; #7 x,-y+3/2,z+1/2; #8 x,-y+1/2,z-1/2

Table S3 Performance comparison of the reported MOFs-based electrodes

| Electrodes | Electrolyte | Voltage (V) | specific capacitance (F g <sup>-1</sup> )        | Ref.      |
|------------|-------------|-------------|--------------------------------------------------|-----------|
| Co-MOF     | 1 M KOH     | 0-0.47      | 446.8 F g <sup>-1</sup> at 1.2 A g <sup>-1</sup> | [27]      |
| Ni-MOF     | 2 M KOH     | 0-0.4       | 726 F g <sup>-1</sup> at 1 A g <sup>-1</sup>     | [31]      |
| SC-1       | 6 M KOH     | 0-0.55      | 705 F g <sup>-1</sup> at 1 A g <sup>-1</sup>     | [36]      |
| MOF-3      | 2 M KOH     | 0-0.38      | 465 F g <sup>-1</sup> at 1 A g <sup>-1</sup>     | [37]      |
| Co-MOF     | 1 M KOH     | 0-0.6       | 148 F g <sup>-1</sup> at 2 A g <sup>-1</sup>     | [38]      |
| SNNU-52    | 2 M KOH     | 0-0.5       | 523 F g <sup>-1</sup> at 1 A g <sup>-1</sup>     | [39]      |
| Cu@BTC-120 | 3 M KOH     | 0-0.5       | 228 F g <sup>-1</sup> at 1.5 A g <sup>-1</sup>   | [41]      |
| Ni-CP      | 7 M KOH     | 0-0.4       | 802 F g <sup>-1</sup> at 3 A g <sup>-1</sup>     | [46]      |
| Mn-BGPD    | 1 M KOH     | 0-0.57      | 832.6 F g <sup>-1</sup> at 1 A g <sup>-1</sup>   | This work |

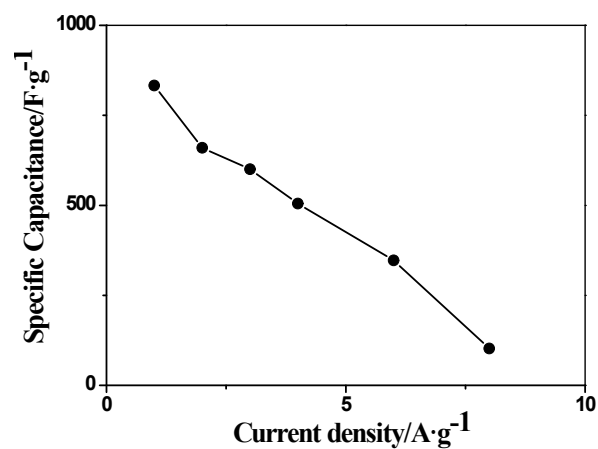

**Figure S1** Specific capacitances of the Mn-BGPD electrode at different current densities

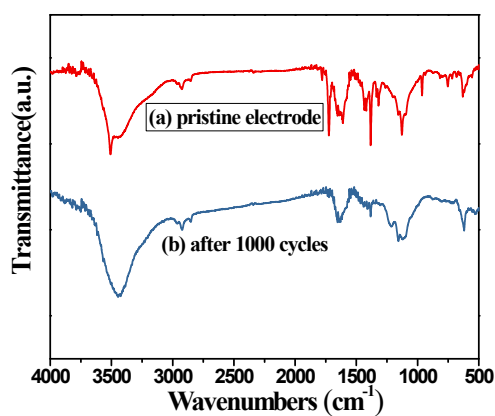

Figure S2. FTIR spectra of the Mn-BGPD (a) pristine electrode containing Mn-BGPD, acetylene black, and PTFE. (b) after 1000 cycles.

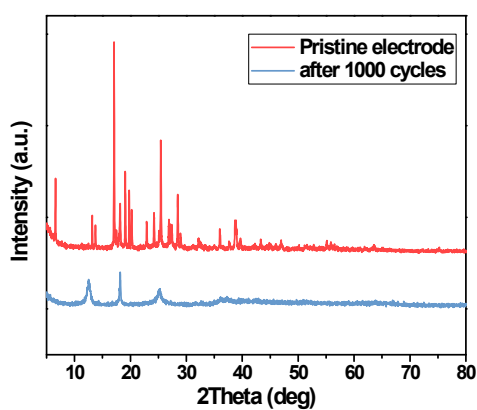

Figure S3. XRD patterns of the Mn-BGPD (a) pristine electrode containing Mn-BGPD, acetylene black, and PTFE. (b) after 1000 cycles.

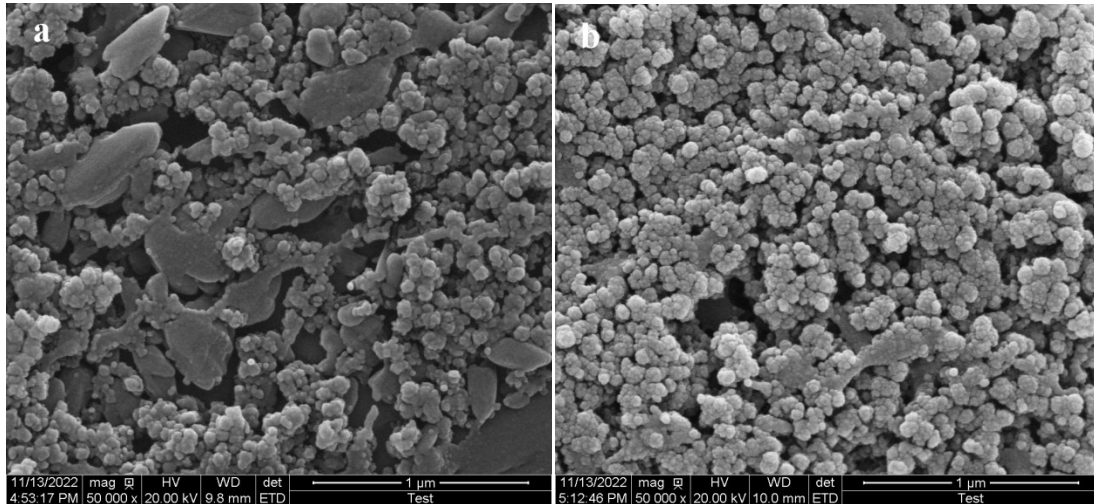

Figure S4. SEM images of the Mn-BGPD (a) pristine electrode containing Mn-BGPD, acetylene black, and PTFE. (b) after 1000 cycles.

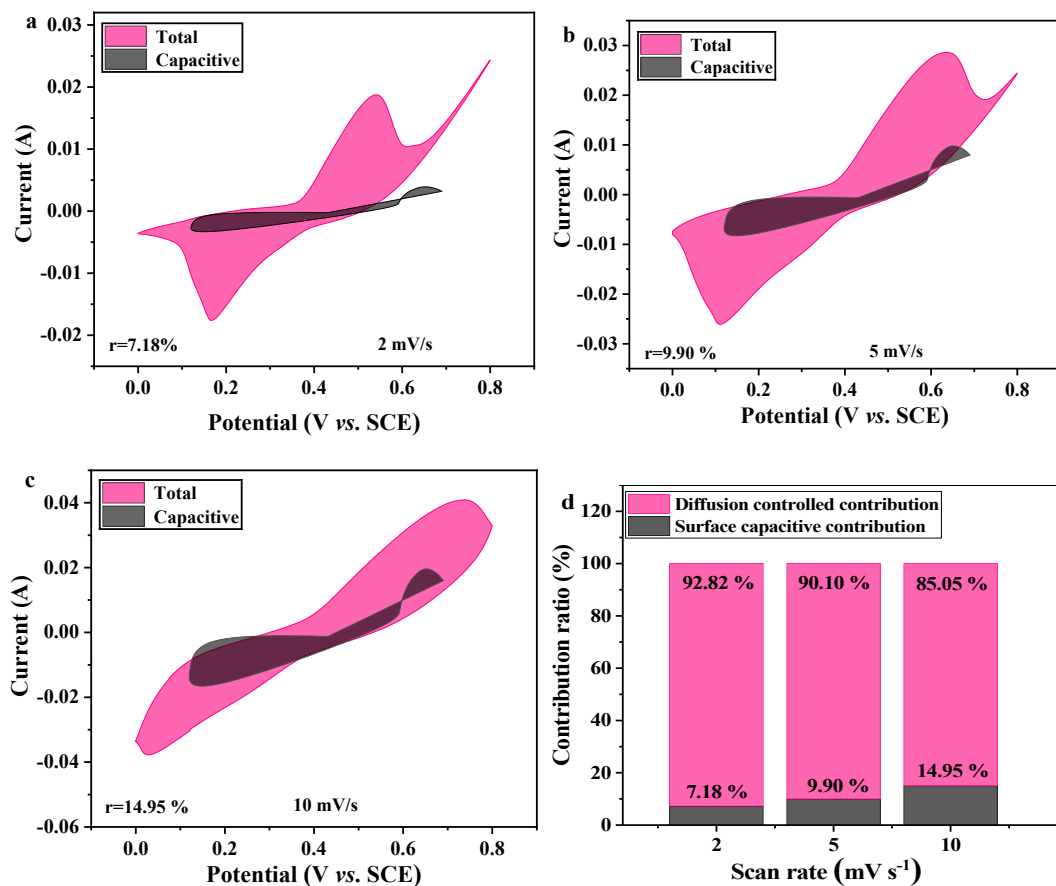

Figure S 5 (a-c) CV curves with capacity separation at different scan rates. (d) The contribution ratios of the diffusion-controlled capacities and capacitive capacities at different scan rates.

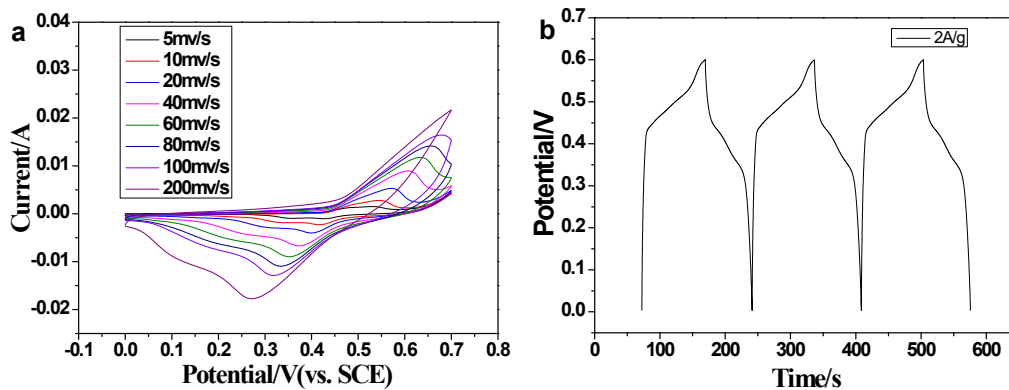

**Figure S6.** (a) CV curves of the rGO electrode at different scanning rates. (b) The charge-discharge curves of the rGO electrode at the current density of  $2\text{A g}^{-1}$ .

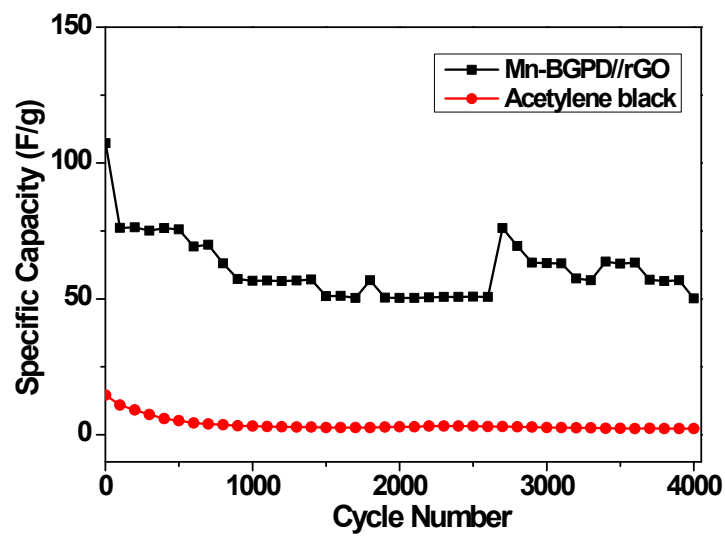

**Figure S7.** Cyclic performance of the Mn-BGPD//rGO ASC and acetylene black

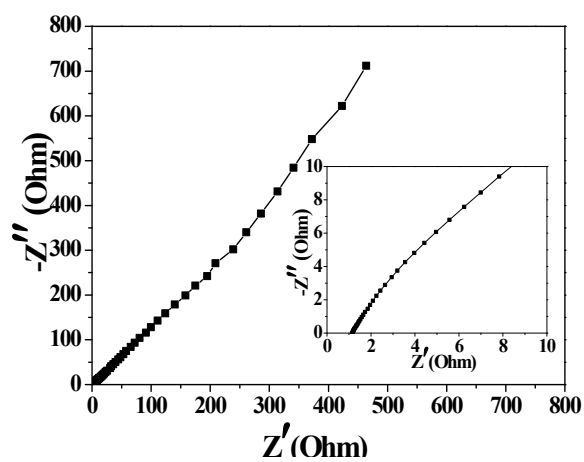

**Figure S8.** Nyquist plot of the Mn-BGPD//rGO ASC
